# Supplementary material
Source: MDPI journal article supplement (https://www.mdpi.com/search?q=antioxidants-09-00217)
Supplement: s001 [file antioxidants-09-00217-s001.pdf]

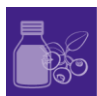

## Supplementary Materials

### Vitamin C activates the folate-mediated one-carbon cycle in C2C12 myocytes

Armando Alcazar Magana, Ralph L. Reed, Rony Koluda, Cristobal L. Miranda, Claudia S. Maier, Jan F. Stevens\*

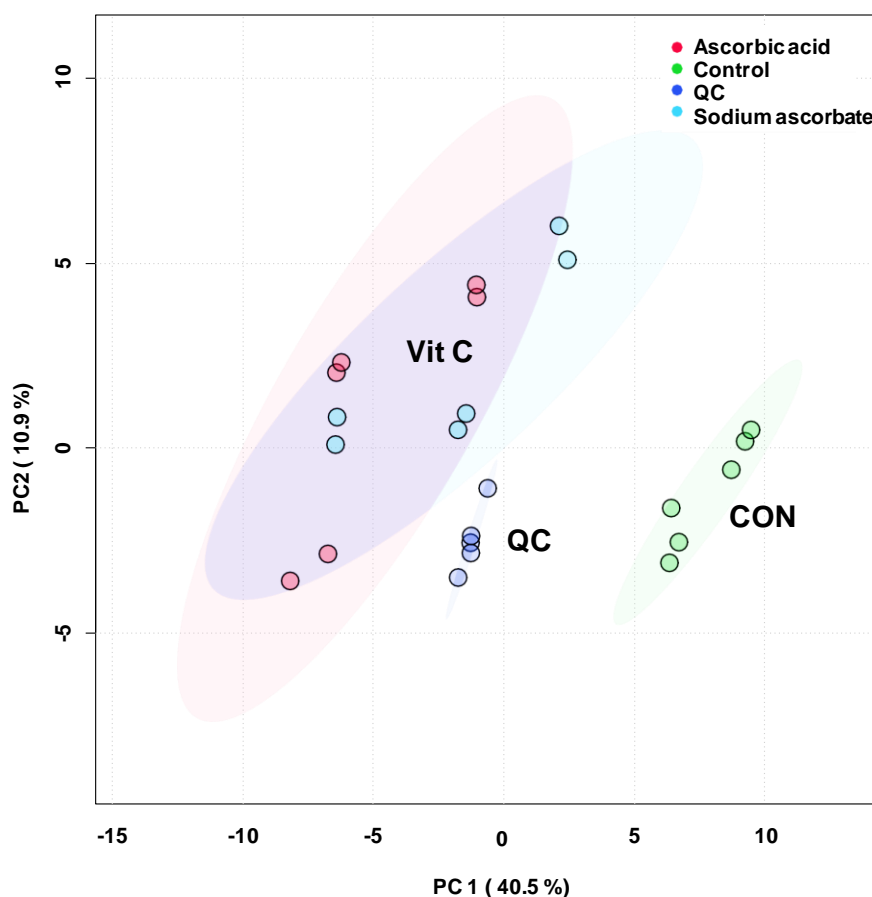

**Figure S1.** Principal component analysis of the metabolomes of sham- and AA-treated C2C12 cells. Each set of dots represents a sample analyzed by LC-MS/MS. QC samples were analyzed every fifth LC-run. Metabolites with CV > 25% were excluded from the analysis.

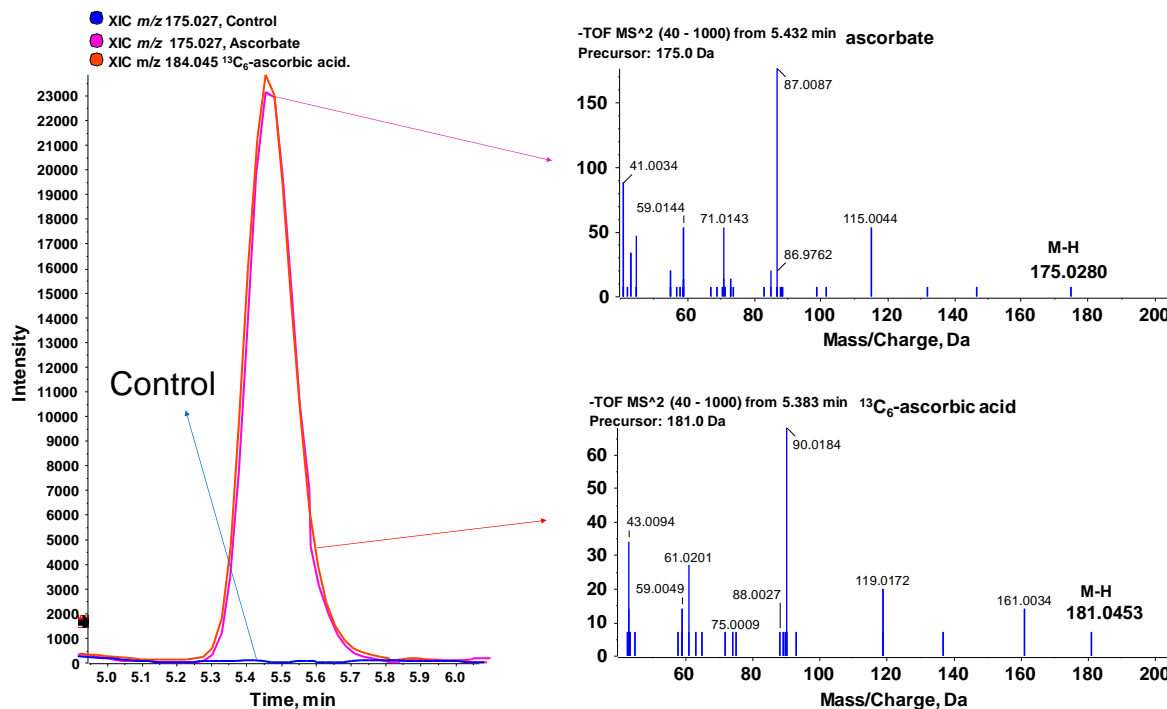

12

13 **Figure S2.** Extracted ion chromatograms showing the total ion currents of the [M-H]<sup>-</sup> ion of  
 14 AA. A representative sample from each experimental group is displayed. The *m/z* 175.028  
 15 [M-H]<sup>-</sup> ion of AA was absent in the control sample (blue) and present only in the sodium  
 16 ascorbate treatment group (pink). The *m/z* 181.045 [M-H]<sup>-</sup> ion corresponding to  $^{13}\text{C}_6$ -ascorbic  
 17 acid was only observed in samples treated with this AA isotopologue. MS/MS spectra  
 18 recorded for the two AA isotopologues are displayed in the panels on the right.

19

20

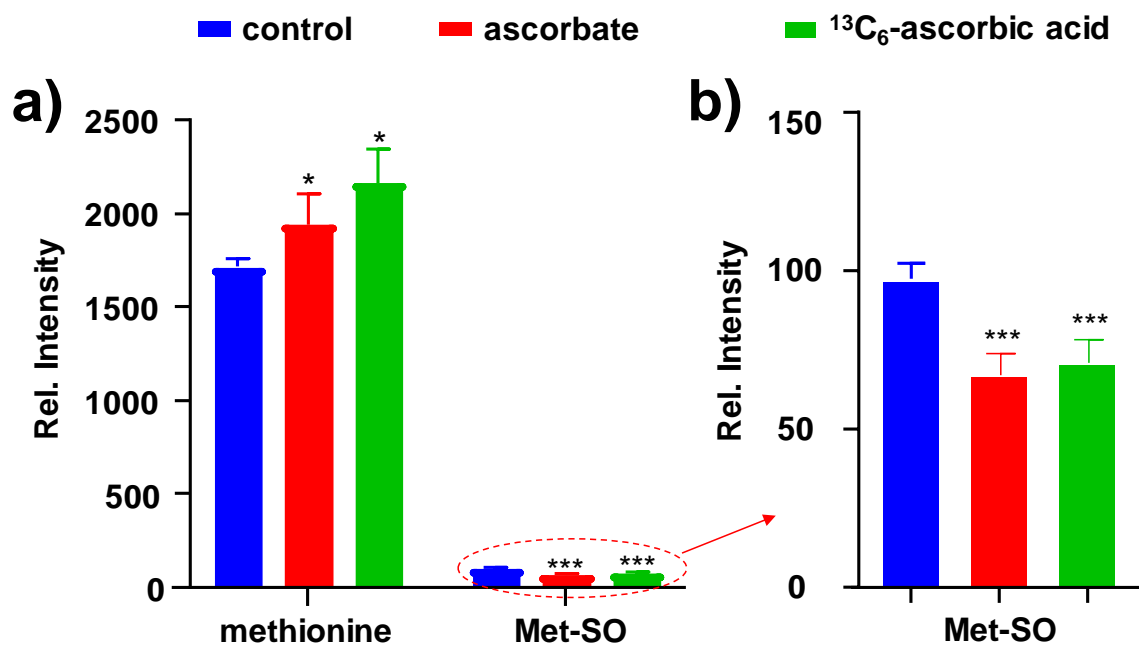

21

22 **Figure S3. (a)** Relative levels of methionine and methionine sulfoxide (Met-SO), and **(b)**  
 23 Relative levels of Met-SO scaled to 100%. Panel **(a)** shows that the AA-related increase of  
 24 methionine does not account for the decrease of Met-SO in the AA-treated cells. Asterisks  
 25 (\*) indicates statistical significance between the control and treatment (\*:  $p \leq 0.05$ , \*\*\*:  $p \leq$   
 26 0.001).

27

28 **Table S1**

29 Compounds with CV<25% on QC's sample injected every five LC runs. Level 1 annotations were obtained from an in-house  
 30 compound library consisting of >700 authentic IROA standards (IROA Technology, Bolton, MA). Level 2 annotations were obtained by  
 31 Progenesis QI™ software with Metlin™ plugin V1.0.6499.51447 (NonLinear Dynamics, United Kingdom) using experimental MS/MS  
 32 fragmentation, and Human Metabolome Database (HMDB) using *in silico* MS/MS fragmentation. Adduct declustering was  
 33 implemented by using Progenesis deconvolution algorithm.

34

| Accepted Description                         | <i>m/z</i> | RT<br>(min) | ESI<br>Mode | Detected Adducts                                                                       | Formula                                                                       | Error (ppm) |
|----------------------------------------------|------------|-------------|-------------|----------------------------------------------------------------------------------------|-------------------------------------------------------------------------------|-------------|
| <b>Level 1 annotations, In-house library</b> |            |             |             |                                                                                        |                                                                               |             |
| 1,2-Dipalmitoyl-sn-glycerol                  | 591.4951   | 27.17       | POS         | M+H <sup>+</sup> -H <sub>2</sub> O, M+NH <sub>4</sub> <sup>+</sup> , M+Na <sup>+</sup> | C <sub>35</sub> H <sub>68</sub> O <sub>5</sub>                                | 1.21        |
| 12-Hydroxydodecanoic acid                    | 239.1619   | 23.42       | POS         | M+Na <sup>+</sup>                                                                      | C <sub>12</sub> H <sub>24</sub> O <sub>3</sub>                                | 0.53        |
| 3(4-Hydroxyphenyl)lactate                    | 181.0507   | 12.17       | NEG         | M-H <sup>+</sup>                                                                       | C <sub>9</sub> H <sub>10</sub> O <sub>4</sub>                                 | 0.24        |
| 5'-CMP                                       | 324.0591   | 4.77        | POS         | M+H <sup>+</sup> , M+Na <sup>+</sup>                                                   | C <sub>9</sub> H <sub>14</sub> N <sub>3</sub> O <sub>8</sub> P                | 0.03        |
| 5-Methyl-THF                                 | 460.1938   | 14.28       | POS         | M+H <sup>+</sup>                                                                       | C <sub>20</sub> H <sub>25</sub> N <sub>7</sub> O <sub>6</sub>                 | 0.26        |
| 5'-Methylthioadenosine                       | 298.0969   | 16.03       | POS         | M+H <sup>+</sup> , M+Na <sup>+</sup>                                                   | C <sub>11</sub> H <sub>15</sub> N <sub>5</sub> O <sub>3</sub> S               | 0.08        |
| Adenine                                      | 136.0612   | 9.14        | POS         | M+H <sup>+</sup>                                                                       | C <sub>5</sub> H <sub>5</sub> N <sub>5</sub>                                  | 3.99        |
| Adenosine                                    | 268.1039   | 9.11        | POS         | M+H <sup>+</sup> , M+Na <sup>+</sup>                                                   | C <sub>10</sub> H <sub>13</sub> N <sub>5</sub> O <sub>4</sub>                 | 0.39        |
| Adenosine 3',5'-diphosphate                  | 450.0186   | 4.97        | POS         | M+Na <sup>+</sup>                                                                      | C <sub>10</sub> H <sub>15</sub> N <sub>5</sub> O <sub>10</sub> P <sub>2</sub> | 0.20        |
| Adenosine 5'-diphosphate                     | 426.0221   | 4.85        | NEG         | M-H <sup>+</sup>                                                                       | C <sub>10</sub> H <sub>15</sub> N <sub>5</sub> O <sub>10</sub> P <sub>2</sub> | 0.21        |
| Adenosine 5'-monophosphate                   | 346.0558   | 5.41        | NEG         | M-H <sup>+</sup>                                                                       | C <sub>10</sub> H <sub>14</sub> N <sub>5</sub> O <sub>7</sub> P               | 0.15        |
| Adenosine-5'-diphosphoglucose                | 428.0365   | 4.87        | POS         | M+H <sup>+</sup>                                                                       | C <sub>10</sub> H <sub>15</sub> N <sub>5</sub> O <sub>10</sub> P <sub>2</sub> | 0.44        |

|                                     |          |       |     |                                      |                                                                 |      |
|-------------------------------------|----------|-------|-----|--------------------------------------|-----------------------------------------------------------------|------|
| Alanine                             | 88.0398  | 4.51  | NEG | M-H <sup>+</sup>                     | C <sub>3</sub> H <sub>7</sub> NO <sub>2</sub>                   | 7.10 |
| Allantoin                           | 157.0365 | 5.03  | NEG | M-H <sup>+</sup>                     | C <sub>4</sub> H <sub>6</sub> N <sub>4</sub> O <sub>3</sub>     | 1.34 |
| Aminocyclopropane carboxylic acid   | 102.0541 | 5.10  | POS | M+H <sup>+</sup>                     | C <sub>4</sub> H <sub>7</sub> NO <sub>2</sub>                   | 8.84 |
| Arginine                            | 175.1186 | 4.38  | POS | M+H <sup>+</sup>                     | C <sub>6</sub> H <sub>14</sub> N <sub>4</sub> O <sub>2</sub>    | 1.95 |
| Asparagine                          | 131.0457 | 4.46  | NEG | M-H <sup>+</sup>                     | C <sub>4</sub> H <sub>8</sub> N <sub>2</sub> O <sub>3</sub>     | 3.54 |
| Aspartate                           | 132.0297 | 4.49  | NEG | M-H <sup>+</sup>                     | C <sub>4</sub> H <sub>7</sub> NO <sub>4</sub>                   | 4.06 |
| Azelaic acid                        | 169.0869 | 20.46 | NEG | M-H <sub>2</sub> O-H <sup>+</sup>    | C <sub>9</sub> H <sub>16</sub> O <sub>4</sub>                   | 0.56 |
| Betaine                             | 118.0854 | 6.53  | POS | M+H <sup>+</sup> , M+Na <sup>+</sup> | C <sub>5</sub> H <sub>11</sub> NO <sub>2</sub>                  | 7.47 |
| Beta-nicotinamide mononucleotide    | 335.0642 | 5.38  | POS | M+H <sup>+</sup>                     | C <sub>11</sub> H <sub>15</sub> N <sub>2</sub> O <sub>8</sub> P | 0.87 |
| Carnitine                           | 162.1119 | 6.05  | POS | M+H <sup>+</sup>                     | C <sub>7</sub> H <sub>15</sub> NO <sub>3</sub>                  | 3.38 |
| Choline                             | 104.1064 | 6.27  | POS | M+H <sup>+</sup>                     | C <sub>5</sub> H <sub>13</sub> NO                               | 6.20 |
| Citrate                             | 215.0160 | 5.78  | POS | M+Na <sup>+</sup>                    | C <sub>6</sub> H <sub>8</sub> O <sub>7</sub>                    | 1.32 |
| Citrulline                          | 174.0882 | 4.79  | NEG | M-H <sup>+</sup>                     | C <sub>6</sub> H <sub>13</sub> N <sub>3</sub> O <sub>3</sub>    | 0.96 |
| CMP                                 | 322.0447 | 4.74  | NEG | M-H <sup>+</sup>                     | C <sub>9</sub> H <sub>14</sub> N <sub>3</sub> O <sub>8</sub> P  | 0.49 |
| Cytidine                            | 244.0924 | 5.20  | POS | M+H <sup>+</sup> , M+Na <sup>+</sup> | C <sub>9</sub> H <sub>13</sub> N <sub>3</sub> O <sub>5</sub>    | 1.68 |
| Cytidine 2',3'-cyclic monophosphate | 306.0486 | 5.17  | POS | M+H <sup>+</sup> , M+Na <sup>+</sup> | C <sub>9</sub> H <sub>12</sub> N <sub>3</sub> O <sub>7</sub> P  | 0.14 |
| Cytosine                            | 112.0497 | 5.20  | POS | M+H <sup>+</sup>                     | C <sub>4</sub> H <sub>5</sub> N <sub>3</sub> O                  | 7.31 |
| Deoxycytidine                       | 272.0891 | 5.81  | NEG | M+FA <sup>-</sup> -H                 | C <sub>9</sub> H <sub>13</sub> N <sub>3</sub> O <sub>4</sub>    | 1.07 |
| Deoxyguanosine 5'-monophosphate     | 346.0556 | 6.99  | NEG | M-H <sup>+</sup>                     | C <sub>10</sub> H <sub>14</sub> N <sub>5</sub> O <sub>7</sub> P | 0.55 |
| Deoxyuridine                        | 249.0495 | 8.45  | NEG | M+Na <sup>+</sup> -2H                | C <sub>9</sub> H <sub>12</sub> N <sub>2</sub> O <sub>5</sub>    | 0.85 |
| D-Glucose 6-phosphate               | 259.0225 | 4.25  | NEG | M-H <sup>+</sup>                     | C <sub>6</sub> H <sub>13</sub> O <sub>9</sub> P                 | 0.16 |
| Dihydroorotate                      | 141.0302 | 5.97  | POS | M+H <sup>+</sup> -H <sub>2</sub> O   | C <sub>5</sub> H <sub>6</sub> N <sub>2</sub> O <sub>4</sub>     | 4.86 |
| D-Ribose 5-phosphate                | 229.0119 | 4.46  | NEG | M-H <sup>+</sup>                     | C <sub>5</sub> H <sub>11</sub> O <sub>8</sub> P                 | 0.08 |

|                                   |          |       |     |                                                                              |                                                                               |       |
|-----------------------------------|----------|-------|-----|------------------------------------------------------------------------------|-------------------------------------------------------------------------------|-------|
| Elaidic acid                      | 303.2332 | 25.88 | NEG | M+Na <sup>+</sup> -2H                                                        | C <sub>18</sub> H <sub>34</sub> O <sub>2</sub>                                | 9.44  |
| Ethanolamine phosphate            | 140.0112 | 4.44  | NEG | M-H <sup>+</sup> , M+Na <sup>+</sup> -2H                                     | C <sub>2</sub> H <sub>8</sub> NO <sub>4</sub> P                               | 4.54  |
| Flavin adenine dinucleotide       | 784.1508 | 16.18 | NEG | M-H <sup>+</sup> , M+Na <sup>+</sup> -2H                                     | C <sub>27</sub> H <sub>33</sub> N <sub>9</sub> O <sub>15</sub> P <sub>2</sub> | 1.14  |
| Folic acid                        | 442.1468 | 17.85 | POS | M+H <sup>+</sup>                                                             | C <sub>19</sub> H <sub>19</sub> N <sub>7</sub> O <sub>6</sub>                 | 0.34  |
| Formylmethionine                  | 176.0384 | 13.33 | NEG | M-H <sup>+</sup>                                                             | C <sub>6</sub> H <sub>11</sub> NO <sub>3</sub> S                              | 1.81  |
| Fumarate                          | 115.0031 | 6.39  | NEG | M-H <sup>+</sup>                                                             | C <sub>4</sub> H <sub>4</sub> O <sub>4</sub>                                  | 4.93  |
| Galactitol                        | 183.0859 | 4.77  | POS | M+H <sup>+</sup> -H <sub>2</sub> O, M+H <sup>+</sup>                         | C <sub>6</sub> H <sub>14</sub> O <sub>6</sub>                                 | 8.73  |
| Gluconic acid                     | 217.0300 | 4.67  | NEG | M-H <sub>2</sub> O-H <sup>+</sup> , M-H <sup>+</sup> , M+Na <sup>+</sup> -2H | C <sub>6</sub> H <sub>12</sub> O <sub>7</sub>                                 | 0.38  |
| Glutamic acid                     | 146.0456 | 4.64  | NEG | M-H <sub>2</sub> O-H <sup>+</sup> , M-H <sup>+</sup>                         | C <sub>5</sub> H <sub>9</sub> NO <sub>4</sub>                                 | 4.20  |
| Glutamine                         | 145.0616 | 4.59  | NEG | M-H <sub>2</sub> O-H <sup>+</sup> , M-H <sup>+</sup>                         | C <sub>5</sub> H <sub>10</sub> N <sub>2</sub> O <sub>3</sub>                  | 3.36  |
| Glutathione                       | 306.0767 | 5.81  | NEG | M-H <sub>2</sub> O-H <sup>+</sup> , M-H <sup>+</sup> , M+Na <sup>+</sup> -2H | C <sub>10</sub> H <sub>17</sub> N <sub>3</sub> O <sub>6</sub> S               | 0.50  |
| Glycerate                         | 105.0188 | 5.03  | NEG | M-H <sup>+</sup>                                                             | C <sub>3</sub> H <sub>6</sub> O <sub>4</sub>                                  | 5.08  |
| Glycerol 2-phosphate              | 171.0060 | 4.44  | NEG | M-H <sup>+</sup>                                                             | C <sub>3</sub> H <sub>9</sub> O <sub>6</sub> P                                | 2.27  |
| Glycine                           | 76.0385  | 4.79  | POS | M+H <sup>+</sup>                                                             | C <sub>2</sub> H <sub>5</sub> NO <sub>2</sub>                                 | 11.19 |
| Glycocholate                      | 464.3009 | 23.90 | NEG | M-H <sup>+</sup>                                                             | C <sub>26</sub> H <sub>43</sub> NO <sub>6</sub>                               | 1.84  |
| Guanidinoacetate                  | 118.0603 | 4.74  | POS | M+H <sup>+</sup>                                                             | C <sub>3</sub> H <sub>7</sub> N <sub>3</sub> O <sub>2</sub>                   | 6.89  |
| Guanosine 5'-monophosphate        | 362.0507 | 5.26  | NEG | M-H <sup>+</sup>                                                             | C <sub>10</sub> H <sub>14</sub> N <sub>5</sub> O <sub>8</sub> P               | 0.02  |
| Hippurate                         | 180.0650 | 17.08 | POS | M+H <sup>+</sup>                                                             | C <sub>9</sub> H <sub>9</sub> NO <sub>3</sub>                                 | 2.98  |
| Inosine                           | 291.0700 | 7.81  | POS | M+Na <sup>+</sup>                                                            | C <sub>10</sub> H <sub>12</sub> N <sub>4</sub> O <sub>5</sub>                 | 0.13  |
| Isoleucine                        | 132.1013 | 6.63  | POS | M+H <sup>+</sup> , M+Na <sup>+</sup>                                         | C <sub>6</sub> H <sub>13</sub> NO <sub>2</sub>                                | 4.54  |
| Lactate                           | 89.0240  | 5.99  | NEG | M-H <sup>+</sup>                                                             | C <sub>3</sub> H <sub>6</sub> O <sub>3</sub>                                  | 4.33  |
| L-aminocyclopropane-1-carboxylate | 84.0436  | 4.64  | POS | M+H <sup>+</sup> -H <sub>2</sub> O, M+H <sup>+</sup>                         | C <sub>4</sub> H <sub>7</sub> NO <sub>2</sub>                                 | 7.46  |
| Lauric acid                       | 199.1702 | 24.54 | NEG | M-H <sup>+</sup>                                                             | C <sub>12</sub> H <sub>24</sub> O <sub>2</sub>                                | 0.58  |
| L-Oleoyl-rac-glycerol             | 379.2818 | 25.53 | POS | M+Na <sup>+</sup>                                                            | C <sub>21</sub> H <sub>40</sub> O <sub>4</sub>                                | 0.29  |
| L-Phenylalanine                   | 164.0717 | 8.48  | NEG | M-H <sup>+</sup>                                                             | C <sub>9</sub> H <sub>11</sub> NO <sub>2</sub>                                | 0.29  |
| Lysine                            | 169.0943 | 4.15  | POS | M+Na <sup>+</sup>                                                            | C <sub>6</sub> H <sub>14</sub> N <sub>2</sub> O <sub>2</sub>                  | 2.97  |

|                          |          |       |     |                                                                          |                                                                               |      |
|--------------------------|----------|-------|-----|--------------------------------------------------------------------------|-------------------------------------------------------------------------------|------|
| Malate                   | 133.0138 | 5.36  | NEG | M-H <sub>2</sub> O-H <sup>+</sup> , M-H <sup>+</sup>                     | C <sub>4</sub> H <sub>6</sub> O <sub>5</sub>                                  | 4.53 |
| Methionine               | 150.0577 | 6.12  | POS | M+H <sup>+</sup>                                                         | C <sub>5</sub> H <sub>11</sub> NO <sub>2</sub> S                              | 4.04 |
| Methylglutaric acid      | 167.0319 | 12.31 | NEG | M+Na <sup>+</sup> -2H                                                    | C <sub>6</sub> H <sub>10</sub> O <sub>4</sub>                                 | 4.38 |
| Methylhistidine          | 170.0919 | 4.71  | POS | M+H <sup>+</sup>                                                         | C <sub>7</sub> H <sub>11</sub> N <sub>3</sub> O <sub>2</sub>                  | 3.12 |
| N-Acetyl-D-galactosamine | 220.0826 | 5.16  | NEG | M-H <sup>+</sup> , M+FA-H                                                | C <sub>8</sub> H <sub>15</sub> NO <sub>6</sub>                                | 0.18 |
| N-Acetyl-D-glucosamine   | 222.0968 | 5.17  | POS | M+H <sup>+</sup> -H <sub>2</sub> O, M+H <sup>+</sup>                     | C <sub>8</sub> H <sub>15</sub> NO <sub>6</sub>                                | 1.29 |
| N-Acetyl-DL-methionine   | 214.0509 | 14.57 | POS | M+Na <sup>+</sup>                                                        | C <sub>7</sub> H <sub>13</sub> NO <sub>3</sub> S                              | 0.50 |
| N-Acetyl-L-phenylalanine | 206.0822 | 19.25 | NEG | M-H <sup>+</sup>                                                         | C <sub>11</sub> H <sub>13</sub> NO <sub>3</sub>                               | 0.15 |
| N-acetylneuraminic acid  | 308.0991 | 4.85  | NEG | M-H <sup>+</sup>                                                         | C <sub>11</sub> H <sub>19</sub> NO <sub>9</sub>                               | 1.22 |
| NADPH                    | 726.0714 | 5.92  | NEG | M-H <sub>2</sub> O-H <sup>+</sup>                                        | C <sub>21</sub> H <sub>30</sub> N <sub>7</sub> O <sub>17</sub> P <sub>3</sub> | 2.46 |
| Nicotinamide             | 123.0545 | 9.98  | POS | M+H <sup>+</sup>                                                         | C <sub>6</sub> H <sub>6</sub> N <sub>2</sub> O                                | 6.07 |
| N-methyl-d-aspartic acid | 180.0862 | 4.82  | POS | M+CH <sub>3</sub> OH+H                                                   | C <sub>5</sub> H <sub>9</sub> NO <sub>4</sub>                                 | 3.00 |
| Ophthalmic acid          | 290.1345 | 6.17  | POS | M+H <sup>+</sup>                                                         | C <sub>11</sub> H <sub>19</sub> N <sub>3</sub> O <sub>6</sub>                 | 0.51 |
| Palmitate                | 255.2332 | 25.54 | NEG | M-H <sup>+</sup> , M+FA-H                                                | C <sub>16</sub> H <sub>32</sub> O <sub>2</sub>                                | 0.82 |
| Palmitoleic acid         | 253.2174 | 25.41 | NEG | M-H <sup>+</sup>                                                         | C <sub>16</sub> H <sub>30</sub> O <sub>2</sub>                                | 0.50 |
| Pantothenic acid         | 218.1035 | 10.51 | NEG | M-H <sup>+</sup>                                                         | C <sub>9</sub> H <sub>17</sub> NO <sub>5</sub>                                | 0.64 |
| Phenylacetyl-glycine     | 192.0665 | 17.88 | NEG | M-H <sup>+</sup>                                                         | C <sub>10</sub> H <sub>11</sub> NO <sub>3</sub>                               | 0.49 |
| Phenylalanine            | 164.0716 | 9.70  | NEG | M-H <sup>+</sup>                                                         | C <sub>9</sub> H <sub>11</sub> NO <sub>2</sub>                                | 0.59 |
| Phosphocholine           | 184.0728 | 5.35  | POS | M+H <sup>+</sup> , M+Na <sup>+</sup>                                     | C <sub>5</sub> H <sub>14</sub> NO <sub>4</sub> P                              | 2.71 |
| Phosphocreatine          | 212.0427 | 4.97  | POS | M+H <sup>+</sup>                                                         | C <sub>4</sub> H <sub>10</sub> N <sub>3</sub> O <sub>5</sub> P                | 1.74 |
| Proline                  | 116.0697 | 5.40  | POS | M+H <sup>+</sup>                                                         | C <sub>5</sub> H <sub>9</sub> NO <sub>2</sub>                                 | 8.02 |
| Pyridoxine               | 170.0806 | 6.74  | POS | M+H <sup>+</sup> -H <sub>2</sub> O, M+H <sup>+</sup>                     | C <sub>8</sub> H <sub>11</sub> NO <sub>3</sub>                                | 5.04 |
| Rac-glycerol-1-myristate | 325.2350 | 24.77 | POS | M+H <sup>+</sup> -H <sub>2</sub> O, M+H <sup>+</sup> , M+Na <sup>+</sup> | C <sub>17</sub> H <sub>34</sub> O <sub>4</sub>                                | 0.30 |
| Riboflavin               | 377.1456 | 19.05 | POS | M+H <sup>+</sup> , M+Na <sup>+</sup>                                     | C <sub>17</sub> H <sub>20</sub> N <sub>4</sub> O <sub>6</sub>                 | 0.03 |
| Serine                   | 104.0344 | 4.46  | NEG | M-H <sup>+</sup>                                                         | C <sub>3</sub> H <sub>7</sub> NO <sub>3</sub>                                 | 8.83 |
| Spermine                 | 203.2227 | 3.13  | POS | M+H <sup>+</sup>                                                         | C <sub>10</sub> H <sub>26</sub> N <sub>4</sub>                                | 1.55 |
| Sphinganine              | 302.3055 | 23.19 | POS | M+H <sup>+</sup>                                                         | C <sub>18</sub> H <sub>39</sub> NO <sub>2</sub>                               | 0.53 |

|                                                                                    |          |       |     |                                                                          |                                                                               |      |
|------------------------------------------------------------------------------------|----------|-------|-----|--------------------------------------------------------------------------|-------------------------------------------------------------------------------|------|
| Succinate                                                                          | 117.0188 | 6.72  | NEG | M-H <sup>+</sup>                                                         | C <sub>4</sub> H <sub>6</sub> O <sub>4</sub>                                  | 4.16 |
| Taurine                                                                            | 124.0070 | 4.51  | NEG | M-H <sup>+</sup>                                                         | C <sub>2</sub> H <sub>7</sub> NO <sub>3</sub> S                               | 2.85 |
| Thiamine                                                                           | 265.1115 | 6.98  | POS | M+H <sup>+</sup>                                                         | C <sub>12</sub> H <sub>16</sub> N <sub>4</sub> OS                             | 0.96 |
| Threonine                                                                          | 118.0505 | 4.64  | NEG | M-H <sup>+</sup>                                                         | C <sub>4</sub> H <sub>9</sub> NO <sub>3</sub>                                 | 4.06 |
| Thymidine                                                                          | 241.0831 | 11.03 | NEG | M-H <sup>+</sup>                                                         | C <sub>10</sub> H <sub>14</sub> N <sub>2</sub> O <sub>5</sub>                 | 0.51 |
| Thymidine 5'-monophosphate                                                         | 323.0628 | 6.77  | POS | M+H <sup>+</sup>                                                         | C <sub>10</sub> H <sub>15</sub> N <sub>2</sub> O <sub>8</sub> P               | 3.33 |
| Trimethyllysine                                                                    | 189.1593 | 5.20  | POS | M+H <sup>+</sup>                                                         | C <sub>9</sub> H <sub>20</sub> N <sub>2</sub> O <sub>2</sub>                  | 2.34 |
| Tryptophan                                                                         | 203.0827 | 11.97 | NEG | M-H <sup>+</sup> , M+Na <sup>+</sup> -2H                                 | C <sub>11</sub> H <sub>12</sub> N <sub>2</sub> O <sub>2</sub>                 | 0.71 |
| Tyrosine                                                                           | 204.0628 | 6.27  | POS | M+Na <sup>+</sup>                                                        | C <sub>9</sub> H <sub>11</sub> NO <sub>3</sub>                                | 1.93 |
| Urate                                                                              | 169.0351 | 5.97  | POS | M+H <sup>+</sup>                                                         | C <sub>5</sub> H <sub>4</sub> N <sub>4</sub> O <sub>3</sub>                   | 2.98 |
| Uridine                                                                            | 245.0767 | 6.53  | POS | M+H <sup>+</sup>                                                         | C <sub>9</sub> H <sub>12</sub> N <sub>2</sub> O <sub>6</sub>                  | 0.63 |
| Uridine 5'-diphosphate                                                             | 402.9948 | 4.98  | NEG | M-H <sup>+</sup>                                                         | C <sub>9</sub> H <sub>14</sub> N <sub>2</sub> O <sub>12</sub> P <sub>2</sub>  | 0.23 |
| Uridine-5-monophosphate                                                            | 323.0290 | 4.84  | NEG | M-H <sup>+</sup> , M+Na <sup>+</sup> -2H                                 | C <sub>9</sub> H <sub>13</sub> N <sub>2</sub> O <sub>9</sub> P                | 1.36 |
| Valine                                                                             | 116.0711 | 5.44  | NEG | M-H <sup>+</sup>                                                         | C <sub>5</sub> H <sub>11</sub> NO <sub>2</sub>                                | 5.12 |
| <b>Level 2 annotations, experimental MS/MS fragmentation matching from METLIN™</b> |          |       |     |                                                                          |                                                                               |      |
| 10-Formyl-THF                                                                      | 474.1731 | 16.96 | POS | M+H <sup>+</sup>                                                         | C <sub>20</sub> H <sub>23</sub> N <sub>7</sub> O <sub>7</sub>                 | 0.05 |
| 13-HpODE                                                                           | 311.2228 | 24.82 | NEG | M-H <sup>+</sup>                                                         | C <sub>18</sub> H <sub>32</sub> O <sub>4</sub>                                | 0.08 |
| 6-Keto-PGF1                                                                        | 393.2249 | 22.40 | POS | M+Na <sup>+</sup>                                                        | C <sub>20</sub> H <sub>34</sub> O <sub>6</sub>                                | 0.34 |
| Acetylcarnitine                                                                    | 204.1227 | 6.77  | POS | M+H <sup>+</sup>                                                         | C <sub>9</sub> H <sub>17</sub> NO <sub>4</sub>                                | 1.68 |
| Aminoadipic acid                                                                   | 162.0755 | 4.92  | POS | M+H <sup>+</sup> -H <sub>2</sub> O, M+H <sup>+</sup>                     | C <sub>6</sub> H <sub>11</sub> NO <sub>4</sub>                                | 4.20 |
| Cytidine diphosphate choline<br>(CDPcholine)                                       | 489.1149 | 5.33  | POS | M+H <sup>+</sup> , M+Na <sup>+</sup>                                     | C <sub>14</sub> H <sub>26</sub> N <sub>4</sub> O <sub>11</sub> P <sub>2</sub> | 0.64 |
| D-Erythrose 4-phosphate                                                            | 199.0015 | 5.08  | NEG | M-H <sup>+</sup>                                                         | C <sub>4</sub> H <sub>9</sub> O <sub>7</sub> P                                | 0.97 |
| DG(18:0/18:0/0:0)                                                                  | 647.5577 | 27.45 | POS | M+H <sup>+</sup> -H <sub>2</sub> O, M+H <sup>+</sup> , M+Na <sup>+</sup> | C <sub>39</sub> H <sub>76</sub> O <sub>5</sub>                                | 1.21 |
| Glutamylglycine                                                                    | 203.0674 | 4.79  | NEG | M-H <sub>2</sub> O-H <sup>+</sup> , M-H <sup>+</sup>                     | C <sub>7</sub> H <sub>12</sub> N <sub>2</sub> O <sub>5</sub>                  | 0.24 |
| Glutathione, oxidized                                                              | 613.1593 | 5.48  | POS | M+H <sup>+</sup>                                                         | C <sub>20</sub> H <sub>32</sub> N <sub>6</sub> O <sub>12</sub> S <sub>2</sub> | 0.17 |
| Glycerophosphocholine                                                              | 258.1100 | 5.45  | POS | M+H <sup>+</sup>                                                         | C <sub>8</sub> H <sub>20</sub> NO <sub>6</sub> P                              | 0.25 |



|                                            |          |       |     |                                                                                                           |                                                                               |      |
|--------------------------------------------|----------|-------|-----|-----------------------------------------------------------------------------------------------------------|-------------------------------------------------------------------------------|------|
| Guanine                                    | 152.0560 | 6.43  | POS | M+H <sup>+</sup>                                                                                          | C <sub>5</sub> H <sub>5</sub> N <sub>5</sub> O                                | 4.32 |
| Hydroxyhexadecanoic acid                   | 271.2277 | 24.92 | NEG | M-H <sup>+</sup>                                                                                          | C <sub>16</sub> H <sub>32</sub> O <sub>3</sub>                                | 0.47 |
| Hypoxanthine                               | 137.0457 | 6.74  | POS | M+H <sup>+</sup> -H <sub>2</sub> O, M+H <sup>+</sup>                                                      | C <sub>5</sub> H <sub>4</sub> N <sub>4</sub> O                                | 6.73 |
| Indoleacrylic acid                         | 188.0703 | 11.92 | POS | M+H <sup>+</sup> , M+NH <sub>4</sub> <sup>+</sup>                                                         | C <sub>11</sub> H <sub>9</sub> NO <sub>2</sub>                                | 1.85 |
| Indolelactic acid                          | 204.0666 | 18.62 | NEG | M-H <sup>+</sup>                                                                                          | C <sub>11</sub> H <sub>11</sub> NO <sub>3</sub>                               | 0.12 |
| L-Tyrosine                                 | 180.0667 | 6.32  | NEG | M-H <sup>+</sup>                                                                                          | C <sub>9</sub> H <sub>11</sub> NO <sub>3</sub>                                | 0.49 |
| LysoPC(18:1)                               | 522.3545 | 25.88 | POS | M+H <sup>+</sup>                                                                                          | C <sub>26</sub> H <sub>52</sub> NO <sub>7</sub> P                             | 1.77 |
| LysoPE(0:0/22:5)                           | 528.3081 | 25.28 | POS | M+H <sup>+</sup>                                                                                          | C <sub>27</sub> H <sub>46</sub> NO <sub>7</sub> P                             | 0.78 |
| LysoPE(18:1/0:0)                           | 502.2877 | 24.90 | POS | M+H <sup>+</sup> , M+Na <sup>+</sup>                                                                      | C <sub>23</sub> H <sub>46</sub> NO <sub>7</sub> P                             | 1.37 |
| Lysophosphatidylserine                     | 526.3127 | 24.90 | POS | M+H <sup>+</sup> -H <sub>2</sub> O, M+H <sup>+</sup> , M+Na <sup>+</sup>                                  | C <sub>24</sub> H <sub>48</sub> NO <sub>9</sub> P                             | 2.36 |
| LysoPI(18:0)                               | 623.3158 | 24.70 | POS | M+H <sup>+</sup> -H <sub>2</sub> O, M+H <sup>+</sup> , M+Na <sup>+</sup>                                  | C <sub>27</sub> H <sub>53</sub> O <sub>12</sub> P                             | 1.23 |
| Methionine sulfoxide                       | 166.0526 | 4.99  | POS | M+H <sup>+</sup> , M+Na <sup>+</sup>                                                                      | C <sub>5</sub> H <sub>11</sub> NO <sub>3</sub> S                              | 4.08 |
| MG(0:0/18:0/0:0)                           | 381.2969 | 25.63 | POS | M+H <sup>+</sup> -H <sub>2</sub> O, M+H <sup>+</sup> , M+NH <sub>4</sub> <sup>+</sup> , M+Na <sup>+</sup> | C <sub>21</sub> H <sub>42</sub> O <sub>4</sub>                                | 1.05 |
| Monopalmitin                               | 353.2661 | 25.26 | POS | M+H <sup>+</sup> -H <sub>2</sub> O, M+H <sup>+</sup> , M+NH <sub>4</sub> <sup>+</sup> , M+Na <sup>+</sup> | C <sub>19</sub> H <sub>38</sub> O <sub>4</sub>                                | 0.02 |
| Muramic acid                               | 234.0977 | 4.69  | POS | M+H <sup>+</sup> -H <sub>2</sub> O, M+H <sup>+</sup>                                                      | C <sub>9</sub> H <sub>17</sub> NO <sub>7</sub>                                | 1.88 |
| Nicotinamide adenine<br>dinucleotide (NAD) | 662.1024 | 6.27  | NEG | M-H <sup>+</sup> , M+Na <sup>+</sup> -2H                                                                  | C <sub>21</sub> H <sub>27</sub> N <sub>7</sub> O <sub>14</sub> P <sub>2</sub> | 0.78 |
| PE(16:1/18:1)                              | 716.5247 | 26.84 | POS | M+H <sup>+</sup>                                                                                          | C <sub>39</sub> H <sub>74</sub> NO <sub>8</sub> P                             | 3.12 |
| PE(18:1/0:0)                               | 478.2934 | 24.90 | NEG | M-H <sup>+</sup> , M+Na <sup>+</sup> -2H                                                                  | C <sub>23</sub> H <sub>46</sub> NO <sub>7</sub> P                             | 1.01 |
| PG(16:0/0:0)                               | 507.2694 | 24.33 | POS | M+H <sup>+</sup> -H <sub>2</sub> O, M+H <sup>+</sup> , M+Na <sup>+</sup>                                  | C <sub>22</sub> H <sub>45</sub> O <sub>9</sub> P                              | 0.19 |
| PG(18:1/0:0)                               | 533.2846 | 24.66 | POS | M+H <sup>+</sup> -H <sub>2</sub> O, M+H <sup>+</sup> , M+Na <sup>+</sup>                                  | C <sub>24</sub> H <sub>47</sub> O <sub>9</sub> P                              | 0.42 |
| Phenyllactic acid                          | 165.0555 | 17.94 | NEG | M-H <sup>+</sup>                                                                                          | C <sub>9</sub> H <sub>10</sub> O <sub>3</sub>                                 | 1.42 |
| Phosphodimethylethanolamine                | 192.0320 | 5.10  | POS | M+H <sup>+</sup> , M+Na <sup>+</sup>                                                                      | C <sub>4</sub> H <sub>12</sub> NO <sub>4</sub> P                              | 3.82 |
| PS(18:1/0:0)                               | 524.2974 | 24.70 | POS | M+H <sup>+</sup> , M+Na <sup>+</sup>                                                                      | C <sub>24</sub> H <sub>46</sub> NO <sub>9</sub> P                             | 1.68 |
| PS(22:6/18:0)                              | 836.5421 | 27.17 | POS | M+H <sup>+</sup> , M+Na <sup>+</sup>                                                                      | C <sub>46</sub> H <sub>78</sub> NO <sub>10</sub> P                            | 1.77 |
| Pyridoxine phosphate                       | 267.0587 | 6.58  | POS | M+H <sup>+</sup> , M+NH <sub>4</sub> <sup>+</sup>                                                         | C <sub>8</sub> H <sub>12</sub> NO <sub>6</sub> P                              | 0.66 |
| Pyroglutamic acid                          | 130.0491 | 6.77  | POS | M+H <sup>+</sup> , M+Na <sup>+</sup>                                                                      | C <sub>5</sub> H <sub>7</sub> NO <sub>3</sub>                                 | 5.73 |

|                                                                        |          |       |     |                                                      |                                                                              |      |
|------------------------------------------------------------------------|----------|-------|-----|------------------------------------------------------|------------------------------------------------------------------------------|------|
| S-Adenosylhomocysteine                                                 | 385.1289 | 6.74  | POS | M+H <sup>+</sup>                                     | C <sub>14</sub> H <sub>20</sub> N <sub>6</sub> O <sub>5</sub> S              | 0.21 |
| S-Adenosylmethionine                                                   | 399.1444 | 5.07  | POS | M+H <sup>+</sup>                                     | C <sub>15</sub> H <sub>22</sub> N <sub>6</sub> O <sub>5</sub> S              | 0.17 |
| Undecanedicarboxylic acid                                              | 243.1602 | 23.31 | NEG | M-H <sup>+</sup>                                     | C <sub>13</sub> H <sub>24</sub> O <sub>4</sub>                               | 0.04 |
| Uridine diphosphate (UDP)                                              | 405.0094 | 4.07  | POS | M+H <sup>+</sup>                                     | C <sub>9</sub> H <sub>14</sub> N <sub>2</sub> O <sub>12</sub> P <sub>2</sub> | 0.27 |
| <b>Level 2 annotations, In silico fragmentation matching from HMDB</b> |          |       |     |                                                      |                                                                              |      |
| 5-Hydroxy-L-tryptophan                                                 | 221.0915 | 6.93  | POS | M+H <sup>+</sup> -H <sub>2</sub> O, M+H <sup>+</sup> | C <sub>11</sub> H <sub>12</sub> N <sub>2</sub> O <sub>3</sub>                | 0.82 |
| 5-Methylcytidine                                                       | 302.1010 | 5.46  | NEG | M+FA-H                                               | C <sub>10</sub> H <sub>15</sub> N <sub>3</sub> O <sub>5</sub>                | 6.50 |
| 5-Tetradecenoic acid                                                   | 271.1915 | 24.07 | NEG | M+FA-H                                               | C <sub>14</sub> H <sub>26</sub> O <sub>2</sub>                               | 0.00 |
| Cer(18:1/24:1)                                                         | 692.6189 | 27.18 | NEG | M+FA-H                                               | C <sub>42</sub> H <sub>81</sub> NO <sub>3</sub>                              | 1.41 |
| Glycerolphosphorylethanolamine                                         | 214.0486 | 4.49  | NEG | M-H <sup>+</sup>                                     | C <sub>5</sub> H <sub>14</sub> NO <sub>6</sub> P                             | 0.20 |
| Homo-L-arginine                                                        | 189.1344 | 4.51  | POS | M+H <sup>+</sup>                                     | C <sub>7</sub> H <sub>16</sub> N <sub>4</sub> O <sub>2</sub>                 | 1.02 |
| L-Homocysteic acid                                                     | 182.0129 | 6.34  | NEG | M-H <sup>+</sup>                                     | C <sub>4</sub> H <sub>9</sub> NO <sub>5</sub> S                              | 0.17 |
| LysoPC(16:0)                                                           | 518.3214 | 25.51 | POS | M+Na <sup>+</sup>                                    | C <sub>24</sub> H <sub>50</sub> NO <sub>7</sub> P                            | 0.70 |
| LysoPC(16:1)                                                           | 538.3144 | 25.28 | NEG | M+FA-H                                               | C <sub>24</sub> H <sub>48</sub> NO <sub>7</sub> P                            | 1.36 |
| N2-Fructopyranosylarginine                                             | 337.1718 | 4.46  | POS | M+H <sup>+</sup>                                     | C <sub>12</sub> H <sub>24</sub> N <sub>4</sub> O <sub>7</sub>                | 0.17 |
| PA(20:2/18:1)                                                          | 771.5186 | 26.91 | NEG | M+FA-H                                               | C <sub>41</sub> H <sub>75</sub> O <sub>8</sub> P                             | 0.66 |
| PC(14:0/20:1)                                                          | 782.5662 | 28.73 | POS | M+Na <sup>+</sup>                                    | C <sub>42</sub> H <sub>82</sub> NO <sub>8</sub> P                            | 1.08 |
| PC(18:0/18:2)                                                          | 830.5914 | 28.92 | NEG | M+FA-H                                               | C <sub>44</sub> H <sub>84</sub> NO <sub>8</sub> P                            | 0.32 |
| PC(18:0/20:5)                                                          | 852.5753 | 29.09 | NEG | M+FA-H                                               | C <sub>46</sub> H <sub>82</sub> NO <sub>8</sub> P                            | 0.89 |
| PC(22:4/16:0)                                                          | 838.5969 | 29.25 | NEG | M+FA-H                                               | C <sub>46</sub> H <sub>84</sub> NO <sub>7</sub> P                            | 0.16 |
| PC(P-18:0/16:1)                                                        | 788.5802 | 28.84 | NEG | M+FA-H                                               | C <sub>42</sub> H <sub>82</sub> NO <sub>7</sub> P                            | 1.26 |
| PE(14:0/18:1)                                                          | 690.5061 | 26.69 | POS | M+H <sup>+</sup> , M+Na <sup>+</sup>                 | C <sub>37</sub> H <sub>72</sub> NO <sub>8</sub> P                            | 1.03 |
| PE(14:0/22:1)                                                          | 790.5605 | 28.50 | NEG | M+FA-H                                               | C <sub>41</sub> H <sub>80</sub> NO <sub>8</sub> P                            | 0.15 |
| PE(14:1/22:0)                                                          | 768.5524 | 27.12 | POS | M+Na <sup>+</sup>                                    | C <sub>41</sub> H <sub>80</sub> NO <sub>8</sub> P                            | 1.43 |
| PE(15:0/20:1)                                                          | 776.5447 | 28.40 | NEG | M+FA-H                                               | C <sub>40</sub> H <sub>78</sub> NO <sub>8</sub> P                            | 0.05 |
| PE(15:0/20:2)                                                          | 774.5287 | 28.40 | NEG | M+FA-H                                               | C <sub>40</sub> H <sub>76</sub> NO <sub>8</sub> P                            | 0.43 |
| PE(15:0/22:1)                                                          | 804.5761 | 28.65 | NEG | M+FA-H                                               | C <sub>42</sub> H <sub>82</sub> NO <sub>8</sub> P                            | 0.10 |

|                    |          |       |     |                       |                                                   |      |
|--------------------|----------|-------|-----|-----------------------|---------------------------------------------------|------|
| PE(15:0/22:2)      | 802.5606 | 28.68 | NEG | M+FA-H                | C <sub>42</sub> H <sub>80</sub> NO <sub>8</sub> P | 0.29 |
| PE(15:0/24:1)      | 832.6058 | 28.87 | NEG | M+FA-H                | C <sub>44</sub> H <sub>86</sub> NO <sub>8</sub> P | 1.94 |
| PE(16:0/18:1)      | 716.5231 | 26.78 | NEG | M-H <sup>+</sup>      | C <sub>39</sub> H <sub>76</sub> NO <sub>8</sub> P | 0.73 |
| PE(16:0/20:4)      | 738.5075 | 26.91 | NEG | M-H <sup>+</sup>      | C <sub>41</sub> H <sub>74</sub> NO <sub>8</sub> P | 0.62 |
| PE(18:0/18:1)      | 766.5385 | 27.08 | NEG | M+Na <sup>+</sup> -2H | C <sub>41</sub> H <sub>80</sub> NO <sub>8</sub> P | 2.28 |
| PE(18:1/18:0)      | 744.5530 | 26.96 | NEG | M-H <sup>+</sup>      | C <sub>41</sub> H <sub>80</sub> NO <sub>8</sub> P | 2.54 |
| PE(18:2/16:0)      | 760.5133 | 26.70 | NEG | M+FA-H                | C <sub>39</sub> H <sub>74</sub> NO <sub>8</sub> P | 0.11 |
| PE(18:2/16:1)      | 758.4971 | 26.68 | NEG | M+FA-H                | C <sub>39</sub> H <sub>72</sub> NO <sub>8</sub> P | 0.87 |
| PE(20:2/16:0)      | 788.5437 | 26.86 | NEG | M+FA-H                | C <sub>41</sub> H <sub>78</sub> NO <sub>8</sub> P | 1.38 |
| PE(20:2/16:1)      | 786.5285 | 26.83 | NEG | M+FA-H                | C <sub>41</sub> H <sub>76</sub> NO <sub>8</sub> P | 0.81 |
| PE(20:4/P-16:0)    | 722.5122 | 27.01 | NEG | M-H <sup>+</sup>      | C <sub>41</sub> H <sub>74</sub> NO <sub>7</sub> P | 1.07 |
| PE(22:1/14:0)      | 746.5671 | 26.99 | POS | M+H <sup>+</sup>      | C <sub>41</sub> H <sub>80</sub> NO <sub>8</sub> P | 3.12 |
| PE(22:1/14:1)      | 744.5529 | 26.99 | POS | M+H <sup>+</sup>      | C <sub>41</sub> H <sub>78</sub> NO <sub>8</sub> P | 1.19 |
| PE(22:6/16:0)      | 762.5082 | 27.06 | NEG | M-H <sup>+</sup>      | C <sub>43</sub> H <sub>74</sub> NO <sub>8</sub> P | 0.33 |
| PE(P-16:0/18:1)    | 700.5287 | 26.88 | NEG | M-H <sup>+</sup>      | C <sub>39</sub> H <sub>76</sub> NO <sub>7</sub> P | 0.11 |
| PE(P-16:0/20:5)    | 720.4969 | 27.01 | NEG | M-H <sup>+</sup>      | C <sub>41</sub> H <sub>72</sub> NO <sub>7</sub> P | 0.61 |
| PE(P-16:0e/0:0)    | 482.2922 | 23.98 | NEG | M+FA-H                | C <sub>21</sub> H <sub>44</sub> NO <sub>6</sub> P | 7.79 |
| PE-NMe(18:0/18:3)  | 800.5441 | 28.68 | NEG | M+FA-H                | C <sub>42</sub> H <sub>78</sub> NO <sub>8</sub> P | 0.86 |
| PE-NMe(20:0/20:2)  | 858.6197 | 29.13 | NEG | M+FA-H                | C <sub>46</sub> H <sub>88</sub> NO <sub>8</sub> P | 3.98 |
| PE-NMe(20:0/22:6)  | 878.5911 | 29.31 | NEG | M+FA-H                | C <sub>48</sub> H <sub>84</sub> NO <sub>8</sub> P | 0.67 |
| PE-NMe(20:1/22:6)  | 876.5762 | 29.35 | NEG | M+FA-H                | C <sub>48</sub> H <sub>82</sub> NO <sub>8</sub> P | 0.23 |
| PE-NMe(22:4/16:0)  | 826.5601 | 28.79 | NEG | M+FA-H                | C <sub>44</sub> H <sub>80</sub> NO <sub>8</sub> P | 0.34 |
| PE-NMe(22:4/18:0)  | 854.5907 | 29.08 | NEG | M+FA-H                | C <sub>46</sub> H <sub>84</sub> NO <sub>8</sub> P | 1.21 |
| PE-NMe(22:5/18:1)  | 850.5601 | 29.08 | NEG | M+FA-H                | C <sub>46</sub> H <sub>80</sub> NO <sub>8</sub> P | 0.32 |
| PE-NMe2(18:1/18:0) | 818.5916 | 28.74 | NEG | M+FA-H                | C <sub>43</sub> H <sub>84</sub> NO <sub>8</sub> P | 0.10 |
| PE-NMe2(20:2/16:0) | 816.5765 | 28.77 | NEG | M+FA-H                | C <sub>43</sub> H <sub>82</sub> NO <sub>8</sub> P | 0.62 |
| PI(18:0/20:4)      | 885.5490 | 27.34 | NEG | M-H <sup>+</sup>      | C <sub>47</sub> H <sub>83</sub> O <sub>13</sub> P | 0.92 |

|                       |          |       |     |                                          |                                                                 |      |
|-----------------------|----------|-------|-----|------------------------------------------|-----------------------------------------------------------------|------|
| PI(18:2/22:2)         | 913.5810 | 27.70 | NEG | M-H <sup>+</sup> , M+FA-H                | C <sub>49</sub> H <sub>87</sub> O <sub>13</sub> P               | 0.13 |
| PI(18:3/18:0)         | 905.5406 | 27.24 | NEG | M+FA-H                                   | C <sub>45</sub> H <sub>81</sub> O <sub>13</sub> P               | 1.04 |
| Prolyl-Hydroxyproline | 229.1181 | 6.22  | POS | M+H <sup>+</sup>                         | C <sub>10</sub> H <sub>16</sub> N <sub>2</sub> O <sub>4</sub>   | 0.82 |
| PS(16:0/16:1)         | 732.4822 | 26.53 | NEG | M-H <sup>+</sup> , M+Na <sup>+</sup> -2H | C <sub>38</sub> H <sub>72</sub> NO <sub>10</sub> P              | 0.08 |
| PS(18:0/18:0)         | 812.5422 | 26.98 | NEG | M+Na <sup>+</sup> -2H                    | C <sub>42</sub> H <sub>82</sub> NO <sub>10</sub> P              | 0.07 |
| PS(18:0/18:1)         | 810.5271 | 26.96 | NEG | M+Na <sup>+</sup> -2H                    | C <sub>42</sub> H <sub>80</sub> NO <sub>10</sub> P              | 0.61 |
| PS(20:4/18:1)         | 790.5021 | 27.03 | NEG | M-H <sub>2</sub> O-H <sup>+</sup>        | C <sub>44</sub> H <sub>76</sub> NO <sub>10</sub> P              | 0.93 |
| PS(22:4/20:3)         | 842.5303 | 27.31 | NEG | M-H <sub>2</sub> O-H <sup>+</sup>        | C <sub>48</sub> H <sub>80</sub> NO <sub>10</sub> P              | 4.41 |
| PS(22:4/20:4)         | 840.5157 | 27.31 | NEG | M-H <sub>2</sub> O-H <sup>+</sup>        | C <sub>48</sub> H <sub>78</sub> NO <sub>10</sub> P              | 3.21 |
| SM(d18:1/24:1)        | 857.6748 | 28.50 | NEG | M+FA-H                                   | C <sub>47</sub> H <sub>93</sub> N <sub>2</sub> O <sub>6</sub> P | 0.66 |
| TG(18:1/16:0/20:2)    | 907.7706 | 28.63 | POS | M+Na <sup>+</sup>                        | C <sub>57</sub> H <sub>104</sub> O <sub>6</sub>                 | 2.20 |
| TG(18:1/18:2/20:5)    | 903.7388 | 28.68 | POS | M+H <sup>+</sup>                         | C <sub>59</sub> H <sub>98</sub> O <sub>6</sub>                  | 5.29 |

35 \* Abbreviations: PA – phosphatidic acid, PE – phosphatidylethanolamine, PG – phosphatidylglycerol, PS – phosphatidylserine, DG –  
36 diglyceride, PC – phosphatidylcholine, PI – phosphatidylinositol, Cer – ceramides, SM – sphingomyelin, TG – triglyceride, DG –  
37 diglyceride, MG – monoglyceride

38

39

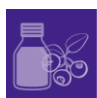

40 **Table. S2.** One-way analysis of variance followed by Tukey's HSD *post hoc* analysis  
41 and Holm FDR-correction. Annotated compounds are sorted by alphabetical order.  
42 Fold change and p-value are presented for the comparison of AA/Control.

43

| Compound                          | FC <sup>b</sup> | p- value |
|-----------------------------------|-----------------|----------|
| 1,2-Dipalmitoyl-sn-glycerol       | 0.91            | 1.28E-02 |
| 10-Formyl-THF                     | 0.08            | 6.31E-07 |
| 12-Hydroxydodecanoic acid         | 1.03            | 2.02E-01 |
| 13-HpODE                          | 1.04            | 4.86E-01 |
| 3(4-Hydroxyphenyl)lactate         | 0.94            | 3.40E-01 |
| 5'-CMP                            | 0.65            | 2.97E-03 |
| 5-Hydroxy-L-tryptophan            | 0.89            | 4.71E-01 |
| 5-Methylcytidine                  | 0.80            | 2.01E-02 |
| 5-Methyl-THF                      | 9.97            | 8.07E-09 |
| 5'-Methylthioadenosine            | 1.40            | 6.86E-02 |
| 5-Tetradecenoic acid              | 0.87            | 9.03E-02 |
| 6-Keto-PGF1                       | 3.37            | 9.93E-04 |
| Acetylcarnitine                   | 0.86            | 7.07E-02 |
| Adenine                           | 1.18            | 3.30E-01 |
| Adenosine                         | 1.28            | 2.15E-02 |
| Adenosine 3',5'-diphosphate       | 0.58            | 4.39E-03 |
| Adenosine 5'-diphosphate          | 0.60            | 2.38E-03 |
| Adenosine 5'-monophosphate        | 0.57            | 1.61E-03 |
| Adenosine-5'-diphosphoglucose     | 0.60            | 9.18E-04 |
| Alanine                           | 1.02            | 8.97E-01 |
| Allantoin                         | 1.19            | 1.74E-02 |
| Aminoadipic acid                  | 0.78            | 4.70E-03 |
| Aminocyclopropane carboxylic acid | 0.72            | 6.29E-02 |
| Arginine                          | 0.96            | 6.91E-01 |
| Asparagine                        | 0.97            | 6.89E-01 |
| Aspartate                         | 0.98            | 7.66E-01 |
| Azelaic acid                      | 1.45            | 3.77E-02 |
| Betaine                           | 1.06            | 4.14E-01 |
| Beta-nicotinamide mononucleotide  | 1.06            | 6.77E-01 |
| Carnitine                         | 0.93            | 3.80E-01 |
| Cer(18:1/24:1)                    | 1.28            | 4.94E-02 |
| Choline                           | 1.13            | 1.89E-02 |
| Citrate                           | 1.12            | 1.88E-01 |
| Citrulline                        | 1.34            | 2.31E-01 |
| CMP                               | 0.66            | 8.79E-03 |

|                                     |      |          |
|-------------------------------------|------|----------|
| Cytidine                            | 1.17 | 1.90E-02 |
| Cytidine 2',3'-cyclic monophosphate | 1.37 | 1.44E-02 |
| Cytidine diphosphate choline        | 0.68 | 1.40E-02 |
| Cytosine                            | 1.11 | 2.45E-01 |
| Deoxycytidine                       | 0.72 | 2.48E-01 |
| Deoxyguanosine 5'-monophosphate     | 0.36 | 5.54E-03 |
| Deoxyuridine                        | 0.92 | 1.91E-01 |
| D-Erythrose 4-phosphate             | 1.09 | 4.55E-01 |
| DG(18:0/18:0/0:0)                   | 0.72 | 3.67E-02 |
| D-Glucose 6-phosphate               | 0.38 | 1.31E-03 |
| Dihydroorotate                      | 0.99 | 9.02E-01 |
| D-Ribose 5-phosphate                | 0.44 | 1.29E-02 |
| Elaidic acid                        | 2.02 | 1.45E-01 |
| Ethanolamine phosphate              | 0.83 | 2.28E-01 |
| Flavin adenine dinucleotide         | 0.69 | 1.94E-02 |
| Folic acid                          | 2.45 | 1.45E-02 |
| Formylmethionine                    | 1.12 | 7.42E-01 |
| Fumarate                            | 1.29 | 3.88E-02 |
| Galactitol                          | 1.15 | 6.46E-01 |
| Gluconic acid                       | 1.15 | 6.48E-03 |
| Glutamic acid                       | 0.86 | 2.93E-02 |
| Glutamine                           | 0.88 | 1.80E-03 |
| Glutamylglycine                     | 1.11 | 5.29E-01 |
| Glutathione                         | 0.72 | 8.18E-02 |
| Glutathione, oxidized               | 1.00 | 8.11E-01 |
| Glycerate                           | 4.38 | 1.65E-03 |
| Glycerol 2-phosphate                | 1.28 | 2.08E-03 |
| Glycerophosphocholine               | 0.85 | 3.51E-02 |
| Glycerylphosphorylethanolamine      | 0.75 | 1.19E-02 |
| Glycine                             | 2.31 | 2.86E-03 |
| Glycocholate                        | 1.81 | 1.85E-03 |
| Guanidinoacetate                    | 2.67 | 4.17E-06 |
| Guanine                             | 1.30 | 5.51E-02 |
| Guanosine 5'-monophosphate          | 0.60 | 4.63E-03 |
| Hippurate                           | 1.46 | 2.13E-03 |
| Homo-L-arginine                     | 1.43 | 4.07E-02 |
| Hydroxyhexadecanoic acid            | 0.86 | 1.64E-01 |
| Hypoxanthine                        | 1.09 | 3.90E-01 |
| Indoleacrylic acid                  | 1.35 | 1.36E-01 |
| Indolelactic acid                   | 1.33 | 1.31E-02 |
| Inosine                             | 1.06 | 5.90E-01 |
| Isoleucine                          | 1.07 | 4.37E-01 |

|                                   |      |          |
|-----------------------------------|------|----------|
| Lactate                           | 0.96 | 4.17E-01 |
| L-aminocyclopropane-1-carboxylate | 0.85 | 4.47E-02 |
| Lauric acid                       | 0.82 | 4.05E-01 |
| L-Homocysteic acid                | 0.69 | 8.07E-02 |
| L-Oleoyl-rac-glycerol             | 0.96 | 7.56E-01 |
| L-Phenylalanine                   | 0.90 | 9.64E-02 |
| L-Tyrosine                        | 1.12 | 1.08E-02 |
| Lysine                            | 1.32 | 3.06E-02 |
| LysoPC(16:0)                      | 1.19 | 2.54E-02 |
| LysoPC(16:1)                      | 1.35 | 2.46E-03 |
| LysoPC(18:1)                      | 1.47 | 4.31E-04 |
| LysoPE(0:0/22:5)                  | 2.25 | 1.87E-02 |
| LysoPE(18:1/0:0)                  | 1.33 | 2.78E-02 |
| Lysophosphatidylserine            | 0.92 | 5.82E-02 |
| LysoPI(18:0/0:0)                  | 1.15 | 1.06E-01 |
| Malate                            | 0.97 | 3.36E-01 |
| Methionine                        | 1.20 | 2.46E-02 |
| Methionine sulfoxide              | 0.71 | 4.90E-5  |
| Methylglutaric acid               | 1.23 | 6.66E-02 |
| Methylhistidine                   | 1.05 | 3.90E-01 |
| MG(0:0/18:0/0:0)                  | 1.02 | 8.29E-01 |
| Monopalmitin                      | 1.07 | 4.41E-01 |
| Muramic acid                      | 4.09 | 1.68E-01 |
| N2-Fructopyranosylarginine        | 6.49 | 2.48E-02 |
| N-Acetyl-D-galactosamine          | 0.46 | 4.80E-03 |
| N-Acetyl-D-glucosamine            | 0.80 | 1.42E-02 |
| N-Acetyl-DL-methionine            | 0.95 | 7.64E-01 |
| N-Acetyl-L-phenylalanine          | 0.85 | 1.24E-01 |
| N-acetylneuraminate               | 1.09 | 8.44E-01 |
| NADPH                             | 0.79 | 3.07E-01 |
| Nicotinamide                      | 1.06 | 6.70E-01 |
| NAD                               | 0.50 | 4.51E-03 |
| N-methyl-d-aspartic acid          | 1.35 | 5.81E-02 |
| Ophthalmic acid                   | 1.11 | 2.63E-01 |
| PA(20:2/18:1)                     | 1.08 | 7.67E-01 |
| Palmitate                         | 0.90 | 4.54E-01 |
| Palmitoleic acid                  | 1.07 | 4.95E-01 |
| Pantothenic acid                  | 1.60 | 8.35E-07 |
| PC(14:0/20:1)                     | 1.33 | 2.49E-01 |
| PC(18:0/18:2)                     | 1.20 | 1.06E-01 |
| PC(18:0/20:5)                     | 1.15 | 3.61E-01 |
| PC(22:4/16:0)                     | 1.07 | 9.33E-01 |

|                      |      |          |
|----------------------|------|----------|
| PC(P-18:0/16:1)      | 1.25 | 4.22E-01 |
| PE(14:0/18:1)        | 1.93 | 5.64E-02 |
| PE(14:0/22:1)        | 1.08 | 6.94E-01 |
| PE(14:1/22:0)        | 1.18 | 6.68E-03 |
| PE(15:0/20:1)        | 1.04 | 7.98E-01 |
| PE(15:0/20:2)        | 1.01 | 9.83E-01 |
| PE(15:0/22:1)        | 1.13 | 4.38E-01 |
| PE(15:0/22:2)        | 1.04 | 8.61E-01 |
| PE(15:0/24:1)        | 1.34 | 1.52E-02 |
| PE(16:0/18:1)        | 1.54 | 6.36E-03 |
| PE(16:0/20:4)        | 1.35 | 7.32E-02 |
| PE(16:1/18:1)        | 1.14 | 3.07E-01 |
| PE(18:0/18:1)        | 1.38 | 8.03E-03 |
| PE(18:1/0:0)         | 1.39 | 1.97E-03 |
| PE(18:1/18:0)        | 1.77 | 8.59E-04 |
| PE(18:2/16:0)        | 0.86 | 2.15E-02 |
| PE(18:2/16:1)        | 0.82 | 1.84E-02 |
| PE(20:2/16:0)        | 0.90 | 2.37E-01 |
| PE(20:2/16:1)        | 0.90 | 1.58E-01 |
| PE(20:4/P-16:0)      | 1.44 | 2.17E-02 |
| PE(22:1/14:0)        | 1.57 | 1.91E-04 |
| PE(22:1/14:1)        | 1.43 | 1.22E-03 |
| PE(22:6/16:0)        | 1.40 | 1.55E-02 |
| PE(P-16:0/18:1)      | 1.03 | 8.91E-01 |
| PE(P-16:0/20:5)      | 1.30 | 1.42E-01 |
| PE(P-16:0e/0:0)      | 1.15 | 2.50E-01 |
| PE-NMe(18:0/18:3)    | 1.08 | 7.39E-01 |
| PE-NMe(20:0/20:2)    | 1.43 | 1.36E-01 |
| PE-NMe(20:0/22:6)    | 1.31 | 2.27E-01 |
| PE-NMe(20:1/22:6)    | 1.08 | 5.64E-01 |
| PE-NMe(22:4/16:0)    | 1.15 | 3.86E-01 |
| PE-NMe(22:4/18:0)    | 1.23 | 2.27E-01 |
| PE-NMe(22:5/18:1)    | 1.50 | 1.29E-02 |
| PE-NMe2(18:1/18:0)   | 1.50 | 2.06E-02 |
| PE-NMe2(20:2/16:0)   | 1.43 | 4.94E-02 |
| PG(16:0/0:0)         | 1.38 | 1.96E-03 |
| PG(18:1/0:0)         | 1.18 | 6.14E-02 |
| Phenylacetyl glycine | 1.66 | 7.95E-04 |
| Phenylalanine        | 0.97 | 5.81E-01 |
| Phenyllactic acid    | 0.97 | 6.49E-01 |
| Phosphocholine       | 0.99 | 7.78E-01 |
| Phosphocreatine      | 0.69 | 1.19E-02 |



|                             |      |          |
|-----------------------------|------|----------|
| Phosphodimethylethanolamine | 1.95 | 7.95E-05 |
| PI(18:0/20:4)               | 0.83 | 6.37E-02 |
| PI(18:2/22:2)               | 0.79 | 2.28E-02 |
| PI(18:3/18:0)               | 0.91 | 5.89E-01 |
| Proline                     | 0.87 | 1.01E-02 |
| Prolyl-Hydroxyproline       | 1.17 | 5.26E-02 |
| PS(16:0/16:1)               | 0.67 | 7.14E-03 |
| PS(18:0/18:0)               | 0.94 | 5.46E-01 |
| PS(18:0/18:1)               | 0.92 | 3.49E-01 |
| PS(18:1/0:0)                | 1.33 | 3.07E-02 |
| PS(20:4/18:1)               | 1.18 | 1.18E-01 |
| PS(22:4/20:3)               | 1.28 | 1.61E-01 |
| PS(22:4/20:4)               | 1.55 | 3.41E-02 |
| PS(22:6/18:0)               | 0.77 | 1.88E-02 |
| Pyridoxine                  | 1.29 | 1.38E-02 |
| Pyridoxine phosphate        | 0.96 | 6.18E-01 |
| Pyroglutamic acid           | 0.97 | 6.18E-01 |
| Rac-glycerol-1-myristate    | 0.92 | 1.20E-01 |
| Riboflavin                  | 1.40 | 1.97E-02 |
| S-Adenosylhomocysteine      | 1.09 | 2.00E-01 |
| S-Adenosylmethionine        | 0.84 | 2.01E-01 |
| Serine                      | 0.98 | 9.43E-01 |
| SM(d18:1/24:1)              | 0.90 | 5.06E-01 |
| Spermine                    | 3.36 | 2.11E-02 |
| Sphinganine                 | 0.95 | 5.50E-02 |
| Succinate                   | 0.64 | 8.12E-03 |
| Taurine                     | 0.85 | 6.55E-02 |
| TG(18:1/16:0/20:2)          | 0.96 | 6.11E-01 |
| TG(18:1/18:2/20:5)          | 0.92 | 8.17E-01 |
| Thiamine                    | 1.00 | 9.59E-01 |
| Threonine                   | 0.94 | 2.03E-01 |
| Thymidine                   | 1.90 | 1.81E-03 |
| Thymidine 5'-monophosphate  | 1.10 | 7.77E-01 |
| Trimethyllysine             | 1.16 | 3.46E-02 |
| Tryptophan                  | 1.08 | 5.31E-01 |
| Tyrosine                    | 1.16 | 2.14E-01 |
| Undecanedicarboxylic acid   | 0.95 | 5.27E-01 |
| Urate                       | 2.69 | 2.63E-04 |
| Uridine                     | 0.93 | 5.44E-01 |
| Uridine 5'-diphosphate      | 0.45 | 4.09E-02 |
| Uridine diphosphate (UDP)   | 0.42 | 1.73E-03 |
| Uridine-5-monophosphate     | 0.75 | 6.92E-02 |

|        |      |          |
|--------|------|----------|
| Valine | 1.23 | 1.44E-01 |
|--------|------|----------|

44

45 \* Abbreviations: PA – phosphatidic acid, PE – phosphatidylethanolamine, PG –

46 phosphatidylglycerol, PS – phosphatidylserine, DG – diglyceride, PC –

47 phosphatidylcholine, PI – phosphatidylinositol, Cer – ceramides, SM – sphingomyelin,

48 TG – triglyceride, DG – diglyceride, MG – monoglyceride.
